# Supplementary material for: A theoretical study on the formation mechanism of carboxylic sulfuric anhydride and its potential role in new particle formation
Source: Royal Society of Chemistry journal article supplement (doi:10.1039/d2ra00226d), 2022-01-01
Supplement: d2ra00226d1.pdf [file d2ra00226d1.pdf]

## Supporting information

# A theoretical study on the formation mechanism of carboxylic sulfuric anhydride and the potential role in new particle formation

Haijie Zhang <sup>1,+</sup>, Wei Wang <sup>2,+</sup>, Hong Li <sup>1</sup>, Rui Gao <sup>1</sup> and Yisheng Xu <sup>1,\*</sup>

<sup>1</sup> State Key Laboratory of Environmental Criteria and Risk Assessment, Chinese Research Academy of Environmental Sciences, Beijing 100012, China; [zhanghaijie@craes.org.cn](mailto:zhanghaijie@craes.org.cn), [lihong@craes.org.cn](mailto:lihong@craes.org.cn), [gaorui@craes.org.cn](mailto:gaorui@craes.org.cn), [xuys@craes.org.cn](mailto:xuys@craes.org.cn)

<sup>2</sup> Key Laboratory of Cluster Science, Ministry of Education of China, School of Chemistry and Chemical Engineering, Beijing Institute of Technology, Beijing 100081, China; [wangwel@stu.xmu.edu.cn](mailto:wangwel@stu.xmu.edu.cn)

+ These authors contributed equally to this work.

\* Correspondence: [xuys@craes.org.cn](mailto:xuys@craes.org.cn)

### I. Supplementary figures.

**Figure S1.** Flowchart for the multistep global minimum sampling method.

**Figure S2.** The most stable configurations at M06-2X/6-311++G(3df,3pd) level of theory of (a) DTAA (b) DTASA-1 and (c) DTASA-2.

### II. Supplementary tables.

**Table S1.** The Gibbs free energies ( $G_{\text{DFT}}$ ) and Gibbs free energy correction terms ( $G_{\text{Therm}}$ ) at M06-2X/6-311++G(3df,3pd) level of theory, single point energies ( $E_{\text{DLPNO}}$ ) at DLPNO-CCSD(T)/aug-cc-pVTZ level of theory, the corrected Gibbs free energies ( $G_{\text{DLPNO}}$ ), and imaginary frequency ( $\nu_{\text{im}}$ ) of transition state calculated for the cycloaddition reaction of  $\text{SO}_3$  to the -COOH group containing C1 in DTAA molecule. All energies are in Hartrees and  $T = 298$  K.

**Table S2.** The Gibbs free energies ( $G_{\text{DFT}}$ ) and Gibbs free energy correction terms ( $G_{\text{Therm}}$ ) at M06-2X/6-311++G(3df,3pd) level of theory, single point energies ( $E_{\text{DLPNO}}$ ) at DLPNO-CCSD(T)/aug-cc-pVTZ level of theory, the corrected Gibbs free energies ( $G_{\text{DLPNO}}$ ), and imaginary frequency ( $\nu_{\text{im}}$ ) of transition state calculated for the cycloaddition reaction of  $\text{SO}_3$  to the -COOH group containing C5 in DTAA molecule. All energies are in Hartrees and  $T = 298$  K.

**Table S3.** The Gibbs free energy  $G$  of  $\text{H}_2\text{O}$ ,  $\text{NH}_3$ , DMA and SA molecules at M062X/6-311++G(3df,3pd) level of theory and pressure of 1 atm,  $T = 298$  K.

**Table S4.** The reaction free energy for forming these clusters ( $\Delta G$ ), potential energy density  $V(\mathbf{r})$  at corresponding BCPs and hydrogen bond energy ( $E_{\text{H}}$ ) for clusters DTAA- $\text{H}_2\text{O}$ , DTASA- $\text{H}_2\text{O}$  and SA- $\text{H}_2\text{O}$ .

**Table S5.** The reaction free energy for forming these clusters ( $\Delta G$ ), potential energy density  $V(\mathbf{r})$  at corresponding BCPs and hydrogen bond energy ( $E_{\text{H}}$ ) for clusters DTAA- $\text{NH}_3$ , DTASA- $\text{NH}_3$  and SA- $\text{NH}_3$ .

**Table S6.** The reaction free energy for forming these clusters ( $\Delta G$ ), potential energy density  $V(\mathbf{r})$  at corresponding BCPs, hydrogen bond energy ( $E_{\text{H}}$ ) for clusters DTAA-DMA, DTASA-DMA and SA-DMA.

**Table S7.** The reaction free energy for forming these clusters ( $\Delta G$ ), potential energy density  $V(\mathbf{r})$  at corresponding

BCPs and hydrogen bond energy ( $E_H$ ) for clusters DTAA-SA, DTASA-SA and SA-SA.

### III. Cartesian coordinates of all optimized structures.

#### I. Supplementary Figure.

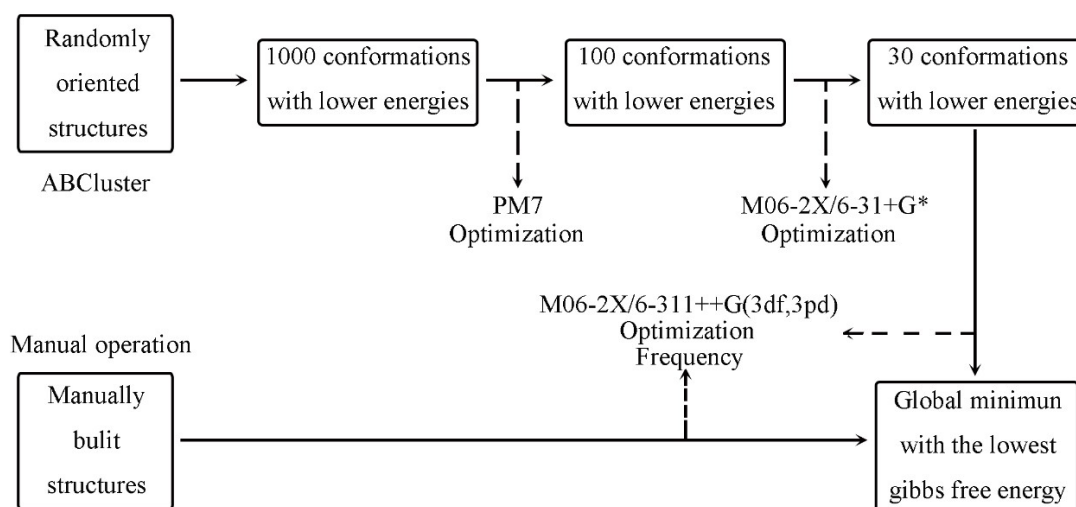

**Figure S1.** Flowchart for the multistep global minimum sampling method.

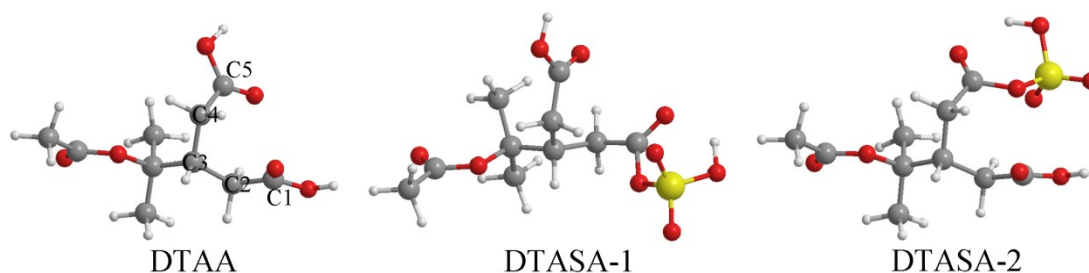

**Figure S2.** The most stable configurations at M06-2X/6-311++G(3df,3pd) level of theory of (a) DTAA (b) DTASA-1 and (c) DTASA-2.

#### II. Supplementary tables.

**Table S1.** The Gibbs free energies ( $G_{DFT}$ ) and Gibbs free energy correction terms ( $G_{Therm}$ ) at M06-2X/6-311++G(3df,3pd) level of theory, single point energies ( $E_{DLPNO}$ ) at DLPNO-CCSD(T)/aug-cc-pVTZ level of theory, the corrected Gibbs free energies ( $G_{DLPNO}$ ), and imaginary frequency ( $\nu_{im}$ ) of transition state calculated for the cycloaddition reaction of  $SO_3$  to the -COOH group containing Cl in DTAA molecule. All energies are in Hartrees and  $T = 298$  K.

|                    | $G_{DFT}$    | $G_{Therm}$ | $E_{DLPNO}$  | $G_{DLPNO}$  | $\nu_{im}$ (cm <sup>-1</sup> ) |
|--------------------|--------------|-------------|--------------|--------------|--------------------------------|
| $SO_3$             | -623.830402  | -0.012729   | -623.0814757 | -623.0942047 |                                |
| DTAA               | -841.866528  | 0.218982    | -840.8798912 | -840.6609092 |                                |
| React <sub>1</sub> | -1465.705124 | 0.230018    | -1463.987555 | -1463.757537 |                                |
| TS <sub>1</sub>    | -1465.705893 | 0.225402    | -1463.98234  | -1463.756938 | -851.9145i                     |
| Prod <sub>1</sub>  | -1465.70872  | 0.228556    | -1463.990469 | -1463.761913 |                                |

**Table S2.** The Gibbs free energies ( $G_{\text{DFT}}$ ) and Gibbs free energy correction terms ( $G_{\text{Therm}}$ ) at M06-2X/6-311++G(3df,3pd) level of theory, single point energies ( $E_{\text{DLPNO}}$ ) at DLPNO-CCSD(T)/aug-cc-pVTZ level of theory, the corrected Gibbs free energies ( $G_{\text{DLPNO}}$ ), and imaginary frequency ( $\nu_{\text{im}}$ ) of transition state calculated for the cycloaddition reaction of  $\text{SO}_3$  to the -COOH group containing C5 in DTAA molecule. All energies are in Hartrees and  $T = 298$  K.

|                    | $G_{\text{DFT}}$ | $G_{\text{Therm}}$ | $E_{\text{DLPNO}}$ | $G_{\text{DLPNO}}$ | $\nu_{\text{im}}$ ( $\text{cm}^{-1}$ ) |
|--------------------|------------------|--------------------|--------------------|--------------------|----------------------------------------|
| React <sub>5</sub> | -1465.706209     | 0.22876            | -1463.987852       | -1463.759092       |                                        |
| TS <sub>5</sub>    | -1465.706437     | 0.225671           | -1463.98374        | -1463.758069       | -887.2504i                             |
| Prod <sub>5</sub>  | -1465.710709     | 0.229317           | -1463.992394       | -1463.763077       |                                        |

**Table S3.** The Gibbs free energy  $G$  of  $\text{H}_2\text{O}$ ,  $\text{NH}_3$ , DMA and SA molecules at M062X/6-311++G(3df,3pd) level of theory and pressure of 1 atm,  $T = 298$  K.

| Monomers             | $G_{\text{DFT}}$ (Hartree) |
|----------------------|----------------------------|
| $\text{H}_2\text{O}$ | -76.423003                 |
| $\text{NH}_3$        | -56.535518                 |
| DMA                  | -135.073214                |
| SA                   | -700.276484                |

**Table S4.** The reaction free energy for forming these clusters ( $\Delta G$ ), potential energy density  $V(\mathbf{r})$  at corresponding BCPs and hydrogen bond energy ( $E_{\text{H}}$ ) for clusters DTAA- $\text{H}_2\text{O}$ , DTASA- $\text{H}_2\text{O}$  and SA- $\text{H}_2\text{O}$ .

| Cluster                     | $\Delta G$<br>(kcal/mol) | hydrogen bond | $V(\mathbf{r})$<br>(a.u) | $E_{\text{H}}$<br>(kcal/mol) |
|-----------------------------|--------------------------|---------------|--------------------------|------------------------------|
| DTAA- $\text{H}_2\text{O}$  | 0.21                     | O1-H1---O3    | -0.03264                 | -10.24                       |
|                             |                          | O3-H2---O2    | -0.02090                 | -6.56                        |
| DTASA- $\text{H}_2\text{O}$ | -2.76                    | O1-H1---O3    | -0.08608                 | -27.01                       |
|                             |                          | O3-H2---O2    | -0.01867                 | -5.86                        |
| SA- $\text{H}_2\text{O}$    | -2.93                    | O1-H1---O3    | -0.05864                 | -18.40                       |
|                             |                          | O3-H2---O2    | -0.01453                 | -4.56                        |

**Table S5.** The reaction free energy for forming these clusters ( $\Delta G$ ), potential energy density  $V(\mathbf{r})$  at

corresponding BCPs and hydrogen bond energy ( $E_H$ ) for clusters DTAA-NH<sub>3</sub>, DTASA-NH<sub>3</sub> and SA-NH<sub>3</sub>.

| Cluster               | $\Delta G$<br>(kcal/mol) | hydrogen bond | $V(\mathbf{r})$<br>(a.u) | $E_H$<br>(kcal/mol) |
|-----------------------|--------------------------|---------------|--------------------------|---------------------|
| DTAA-NH <sub>3</sub>  | -0.71                    | O1-H1---N     | -0.04604                 | -14.44              |
|                       |                          | N-H2---O2     | -0.00916                 | -2.88               |
| DTASA-NH <sub>3</sub> | -8.34                    | N-H1---O1     | -0.08609                 | -27.01              |
|                       |                          | N-H2---O2     | -0.01335                 | -4.19               |
|                       |                          | N-H3---O3     | -0.01759                 | -5.52               |
| SA-NH <sub>3</sub>    | -7.33                    | O1-H1---N     | -0.07955                 | -24.96              |
|                       |                          | N-H2---O2     | -0.00894                 | -2.81               |

**Table S6.** The reaction free energy for forming these clusters ( $\Delta G$ ), potential energy density  $V(\mathbf{r})$  at corresponding BCPs, hydrogen bond energy ( $E_H$ ) for clusters DTAA-DMA, DTASA-DMA and SA-DMA.

| Cluster   | $\Delta G$<br>(kcal/mol) | hydrogen bond | $V(\mathbf{r})$<br>(a.u) | $E_H$<br>(kcal/mol) |
|-----------|--------------------------|---------------|--------------------------|---------------------|
| DTAA-DMA  | -1.90                    | O1-H1---N     | -0.05995                 | -18.81              |
| DTASA-DMA | -15.53                   | N-H1---O1     | -0.06806                 | -21.35              |
|           |                          | N-H2---O2     | -0.01429                 | -4.48               |
| SA-DMA    | -11.25                   | N-H1---O1     | -0.09464                 | -29.69              |
|           |                          | N-H2---O2     | -0.01743                 | -5.47               |

**Table S7.** The reaction free energy for forming these clusters ( $\Delta G$ ), potential energy density  $V(\mathbf{r})$  at corresponding BCPs and hydrogen bond energy ( $E_H$ ) for clusters DTAA-SA, DTASA-SA and SA-SA.

| Cluster  | $\Delta G$<br>(kcal/mol) | hydrogen bond | $V(\mathbf{r})$<br>(a.u) | $E_H$<br>(kcal/mol) |
|----------|--------------------------|---------------|--------------------------|---------------------|
| DTAA-SA  | -7.88                    | O1-H1---O2    | -0.08734                 | -27.40              |
|          |                          | O3-H2---O4    | -0.04111                 | -12.90              |
| DTASA-SA | -7.99                    | O1-H1---O2    | -0.06277                 | -19.70              |
|          |                          | O3-H2---O4    | -0.05281                 | -16.57              |
|          |                          | O5-H3---O6    | -0.02660                 | -8.35               |
| SA-SA    | -8.42                    | O1-H1---O2    | -0.05362                 | -16.82              |
|          |                          | O3-H2---O4    | -0.05363                 | -16.83              |

### III. Coordinates of the clusters in the system.

**Table S8.** Geometry of SO<sub>3</sub>. Units are in angstrom.

| Atom | X        | Y         | Z         |
|------|----------|-----------|-----------|
| S    | 0.000000 | 0.000000  | 0.000060  |
| O    | 0.000000 | 0.000000  | 1.413527  |
| O    | 0.000000 | 1.224138  | -0.706824 |
| O    | 0.000000 | -1.224138 | -0.706824 |

**Table S9.** Geometry of DTAA. Units are in angstrom.

| Atom | X           | Y           | Z           |
|------|-------------|-------------|-------------|
| C    | -3.25682800 | -0.15178000 | 0.25281000  |
| C    | -4.07202800 | 0.23506500  | 1.45675800  |
| C    | 1.25647600  | 1.85885900  | -0.12332600 |
| C    | -0.95166800 | -0.60921700 | -0.40784600 |
| C    | 0.35307700  | -0.49699600 | 0.41735100  |
| O    | 0.70861800  | 3.08693400  | -0.13055100 |
| O    | 2.18790600  | 1.57813400  | -0.82789700 |
| H    | -5.11524200 | 0.31348000  | 1.17330900  |
| H    | -3.71478900 | 1.18505300  | 1.84979100  |
| H    | -3.94705200 | -0.51258200 | 2.23752800  |
| H    | 1.21163200  | 3.61946600  | -0.76082400 |
| O    | -3.70555500 | -0.34018800 | -0.84326300 |
| O    | -1.96183000 | -0.25742800 | 0.57895100  |
| C    | -1.19400900 | -2.03980200 | -0.87321200 |
| H    | -1.07077200 | -2.73896200 | -0.04558200 |
| H    | -2.19801800 | -2.13268500 | -1.27630900 |
| H    | -0.48988500 | -2.30093300 | -1.66097000 |
| C    | -0.98035100 | 0.37246700  | -1.57642800 |
| H    | -1.09619900 | 1.39451000  | -1.21599200 |
| H    | -0.04663500 | 0.30955900  | -2.13417800 |
| H    | -1.80555100 | 0.15138200  | -2.24512900 |
| C    | 0.60839000  | 0.94787700  | 0.88274200  |
| H    | -0.32037100 | 1.39316300  | 1.22754900  |
| H    | 1.29778500  | 0.91671400  | 1.72668900  |
| C    | 1.53424600  | -1.15327800 | -0.29969600 |
| H    | 1.35826900  | -2.22634900 | -0.39270600 |
| H    | 1.68732800  | -0.76736900 | -1.30412700 |
| C    | 2.83680200  | -1.02223600 | 0.44184000  |
| O    | 3.88080300  | -1.32289100 | -0.34372400 |
| H    | 4.67902400  | -1.23520300 | 0.19260700  |
| O    | 2.96438700  | -0.73798200 | 1.60055100  |
| H    | 0.17120900  | -1.06763800 | 1.32986500  |

**Table S10.** Geometry of React<sub>1</sub> for DTAA. Units are in angstrom.

| Atom | X           | Y           | Z           |
|------|-------------|-------------|-------------|
| S    | 3.67335300  | 0.24638000  | 0.74346400  |
| O    | 3.29474600  | 1.52683000  | 0.26713300  |
| O    | 4.35488200  | -0.62214500 | -0.18720800 |
| O    | 3.94292700  | 0.05734900  | 2.11689200  |
| C    | -4.36663600 | 0.24091300  | 0.73216500  |
| C    | -4.86635300 | 1.09258700  | 1.86575100  |
| C    | 0.16969400  | 1.40237400  | -1.14608000 |
| C    | -2.30121100 | -0.68892500 | -0.17169300 |
| C    | -0.83679200 | -0.48824200 | 0.29605800  |
| O    | -0.06825300 | 2.68640000  | -1.42434700 |
| O    | 0.81540100  | 0.69469700  | -1.87477300 |
| H    | -4.35299300 | 2.05191600  | 1.86047400  |
| H    | -4.64273100 | 0.60426900  | 2.81239600  |
| H    | -5.93567600 | 1.23539200  | 1.76139600  |
| H    | 0.40890600  | 2.90413000  | -2.23660000 |
| O    | -5.05700200 | -0.23848600 | -0.12176700 |
| O    | -3.03464400 | 0.08691200  | 0.81202200  |
| C    | -2.71861700 | -2.15082800 | -0.06530800 |
| H    | -2.46813400 | -2.54846800 | 0.91884000  |
| H    | -3.78824200 | -2.24256900 | -0.22682600 |
| H    | -2.21296800 | -2.74513000 | -0.82434900 |
| C    | -2.53124400 | -0.13359000 | -1.57495100 |
| H    | -2.48155900 | 0.95531000  | -1.57025400 |
| H    | -1.76595200 | -0.50453700 | -2.25552200 |
| H    | -3.50598500 | -0.42762200 | -1.94971400 |
| C    | -0.41232500 | 0.98710400  | 0.17619800  |
| H    | -1.25681600 | 1.62862400  | 0.41249300  |
| H    | 0.36421800  | 1.21480200  | 0.90724900  |
| C    | 0.08227700  | -1.51898400 | -0.38518800 |
| H    | -0.06174400 | -2.49689100 | 0.08005000  |
| H    | -0.12504800 | -1.63664100 | -1.44550300 |
| C    | 1.53948100  | -1.22718500 | -0.28245000 |
| O    | 2.30153900  | -1.75250800 | -1.16721800 |
| H    | 3.24435200  | -1.46204800 | -0.99519900 |
| O    | 1.96267500  | -0.54547500 | 0.68243200  |
| H    | -0.84108100 | -0.71255000 | 1.36330700  |

**Table S11.** Geometry of TS<sub>1</sub> for DTAA. Units are in angstrom.

| Atom | X           | Y           | Z           |
|------|-------------|-------------|-------------|
| S    | 3.54044300  | 0.19377000  | 0.75775400  |
| O    | 3.30511200  | 1.47449000  | 0.20182400  |
| O    | 4.27100800  | -0.73779000 | -0.14709500 |
| O    | 3.88433300  | 0.05305900  | 2.11759300  |
| C    | -4.35692600 | 0.19835300  | 0.71609700  |
| C    | -4.86999000 | 1.00857200  | 1.87390900  |
| C    | 0.19543200  | 1.46622600  | -1.07973100 |
| C    | -2.27752300 | -0.68462300 | -0.20475600 |
| C    | -0.81711000 | -0.48592300 | 0.27833100  |
| O    | 0.02344000  | 2.77672600  | -1.26902700 |
| O    | 0.80289600  | 0.77669300  | -1.85601400 |
| H    | -4.37056700 | 1.97500600  | 1.89792200  |
| H    | -4.64017900 | 0.49571800  | 2.80594500  |
| H    | -5.94112600 | 1.13932300  | 1.77222400  |
| H    | 0.51416500  | 3.02549600  | -2.06413400 |
| O    | -5.03900000 | -0.26039800 | -0.15555700 |
| O    | -3.02376300 | 0.05520300  | 0.79727400  |
| C    | -2.68418000 | -2.15235800 | -0.14388800 |
| H    | -2.43869800 | -2.57614500 | 0.83056800  |
| H    | -3.75175000 | -2.24734600 | -0.31669500 |
| H    | -2.16823900 | -2.72118900 | -0.91534600 |
| C    | -2.50389600 | -0.09072300 | -1.59246000 |
| H    | -2.45569900 | 0.99774500  | -1.55787200 |
| H    | -1.73576700 | -0.44141800 | -2.28018800 |
| H    | -3.47721500 | -0.37563600 | -1.97760200 |
| C    | -0.41032900 | 0.99727600  | 0.21351600  |
| H    | -1.26898100 | 1.62073600  | 0.44901200  |
| H    | 0.34042800  | 1.21758600  | 0.97266400  |
| C    | 0.11129300  | -1.49018800 | -0.43149100 |
| H    | -0.02493900 | -2.47922100 | 0.01221100  |
| H    | -0.10245500 | -1.58622900 | -1.49260600 |
| C    | 1.57337400  | -1.21239300 | -0.35197200 |
| O    | 2.36638900  | -1.67185600 | -1.18112600 |
| H    | 3.45809200  | -1.28197000 | -0.81826000 |
| O    | 1.96988100  | -0.52128800 | 0.68655900  |
| H    | -0.82737800 | -0.74680600 | 1.33731900  |

**Table S12.** Geometry of Prod<sub>1</sub> for DTAA. Units are in angstrom.

| Atom | X           | Y           | Z           |
|------|-------------|-------------|-------------|
| S    | 3.41663100  | -0.89239200 | 0.49344600  |
| O    | 3.15423500  | 0.07165900  | 1.49631900  |
| O    | 4.51557300  | -0.38356900 | -0.47907500 |
| O    | 3.68931500  | -2.23895100 | 0.78777100  |
| C    | -4.04612500 | -1.05121900 | 0.50590600  |
| C    | -4.38591200 | -1.71150900 | 1.81355700  |
| C    | -0.34872800 | 2.19304300  | 0.67419100  |
| C    | -2.12781500 | -0.21269900 | -0.75080300 |
| C    | -0.63468300 | -0.17201900 | -0.34466700 |
| O    | -0.66058500 | 2.85134100  | 1.80176700  |
| O    | -0.06218000 | 2.76303000  | -0.34083800 |
| H    | -4.06047300 | -1.07962800 | 2.63775300  |
| H    | -3.85536700 | -2.65811000 | 1.89427100  |
| H    | -5.45627400 | -1.87362100 | 1.86519000  |
| H    | -0.56687400 | 3.79555800  | 1.61871500  |
| O    | -4.84334100 | -0.74799100 | -0.33582400 |
| O    | -2.72220400 | -0.85111000 | 0.41220000  |
| C    | -2.32954300 | -1.10300400 | -1.97135500 |
| H    | -1.82012900 | -2.05831900 | -1.83961200 |
| H    | -3.38866800 | -1.28128000 | -2.12905800 |
| H    | -1.93585800 | -0.61296600 | -2.86038600 |
| C    | -2.72847000 | 1.17171200  | -0.96600000 |
| H    | -2.80654500 | 1.70891700  | -0.02034400 |
| H    | -2.09663400 | 1.75278300  | -1.63472800 |
| H    | -3.72310200 | 1.09097000  | -1.39222100 |
| C    | -0.36738000 | 0.70072500  | 0.88872400  |
| H    | -1.08903900 | 0.46857500  | 1.66815800  |
| H    | 0.61531400  | 0.45871500  | 1.30823500  |
| C    | 0.28695100  | 0.14371600  | -1.53773200 |
| H    | 0.23643800  | -0.67583600 | -2.25533800 |
| H    | 0.03704900  | 1.07773700  | -2.02934700 |
| C    | 1.71538000  | 0.24568200  | -1.10498500 |
| O    | 2.46558200  | 1.15706000  | -1.26868000 |
| H    | 4.25575100  | 0.50401900  | -0.79564500 |
| O    | 2.11246800  | -0.91814600 | -0.46588000 |
| H    | -0.40464400 | -1.19237800 | -0.03386600 |



**Table S13.** Geometry of React<sub>5</sub> for DTAA. Units are in angstrom.

| Atom | X           | Y           | Z           |
|------|-------------|-------------|-------------|
| S    | 3.04221900  | -1.19053400 | 0.37629000  |
| O    | 4.17871600  | -0.40144400 | 0.10048800  |
| O    | 2.88993700  | -2.41670000 | -0.37433200 |
| O    | 2.44181500  | -1.15513900 | 1.66065000  |
| C    | -4.07725400 | -0.70416800 | -0.02780200 |
| C    | -5.02478500 | -0.84607100 | -1.18645800 |
| C    | 0.72670400  | -0.64295800 | -1.06866400 |
| C    | -1.96075700 | 0.33878700  | 0.57900300  |
| C    | -0.95857200 | 1.13189700  | -0.29261100 |
| O    | 0.61906000  | -1.89023700 | -1.35004100 |
| O    | 1.74692500  | -0.15360600 | -0.52128000 |
| H    | -5.87759400 | -1.44105600 | -0.88074300 |
| H    | -4.51344700 | -1.32412600 | -2.02004100 |
| H    | -5.34874200 | 0.13815100  | -1.51844000 |
| H    | 1.45759100  | -2.36339800 | -1.05550500 |
| O    | -4.23623200 | -1.19587700 | 1.05306100  |
| O    | -3.02202600 | 0.05242700  | -0.37179700 |
| C    | -2.51736500 | 1.20948300  | 1.69909000  |
| H    | -2.84572300 | 2.17407900  | 1.31075100  |
| H    | -3.35643000 | 0.70813000  | 2.17184000  |
| H    | -1.75541400 | 1.37474700  | 2.45851000  |
| C    | -1.35457000 | -0.95517000 | 1.12000900  |
| H    | -1.31012300 | -1.71364900 | 0.33969200  |
| H    | -0.34365200 | -0.77851500 | 1.49258400  |
| H    | -1.95250300 | -1.35206400 | 1.93360900  |
| C    | -0.38967200 | 0.26588600  | -1.44330900 |
| H    | -1.18228100 | -0.32382300 | -1.89398600 |
| H    | 0.02319300  | 0.94277800  | -2.19293100 |
| C    | 0.09546900  | 1.84209200  | 0.55971800  |
| H    | -0.39174600 | 2.60410700  | 1.16925900  |
| H    | 0.61152200  | 1.17590300  | 1.24895800  |
| C    | 1.13311000  | 2.57156500  | -0.25299900 |
| O    | 2.20991400  | 2.86291300  | 0.48089500  |
| H    | 2.84557800  | 3.31788200  | -0.08688000 |
| O    | 1.01852100  | 2.88990500  | -1.40479300 |
| H    | -1.54262800 | 1.90340900  | -0.79599100 |

**Table S14.** Geometry of TS<sub>5</sub> for DTAA. Units are in angstrom.

| Atom | X           | Y           | Z           |
|------|-------------|-------------|-------------|
| S    | 2.96521100  | -1.10591300 | 0.35461100  |
| O    | 4.17492600  | -0.43784800 | 0.08463900  |
| O    | 2.81415300  | -2.40692800 | -0.34853900 |
| O    | 2.39034200  | -1.08124100 | 1.64995800  |
| C    | -4.09089200 | -0.64967500 | -0.05181500 |
| C    | -5.02022000 | -0.79745600 | -1.22434100 |
| C    | 0.72794200  | -0.74040500 | -1.02710000 |
| C    | -1.96030600 | 0.35418000  | 0.56973700  |
| C    | -0.92175100 | 1.09882800  | -0.30201200 |
| O    | 0.64146600  | -1.97251600 | -1.16787400 |
| O    | 1.80584700  | -0.17909700 | -0.55084000 |
| H    | -5.88364200 | -1.38045600 | -0.92531100 |
| H    | -4.50045900 | -1.28846100 | -2.04492200 |
| H    | -5.33028600 | 0.18625900  | -1.57120400 |
| H    | 1.68369200  | -2.40892100 | -0.79544000 |
| O    | -4.28333100 | -1.10741700 | 1.03839900  |
| O    | -3.01042900 | 0.07113300  | -0.39438200 |
| C    | -2.51540900 | 1.26800600  | 1.65584500  |
| H    | -2.80804000 | 2.23170100  | 1.23783500  |
| H    | -3.37796500 | 0.80086200  | 2.12157800  |
| H    | -1.76523600 | 1.42976700  | 2.42763900  |
| C    | -1.40006000 | -0.94012200 | 1.15670300  |
| H    | -1.36195500 | -1.72100300 | 0.39896700  |
| H    | -0.39047800 | -0.78117500 | 1.54144400  |
| H    | -2.02233500 | -1.29538200 | 1.97141300  |
| C    | -0.35627000 | 0.19521400  | -1.42766800 |
| H    | -1.15713300 | -0.38606500 | -1.87437200 |
| H    | 0.08012800  | 0.84993000  | -2.18357800 |
| C    | 0.13770600  | 1.80086600  | 0.54953100  |
| H    | -0.34189800 | 2.57380900  | 1.15136800  |
| H    | 0.64340400  | 1.13420500  | 1.24625700  |
| C    | 1.18259500  | 2.51394100  | -0.26882400 |
| O    | 2.27460700  | 2.77546200  | 0.45450700  |
| H    | 2.91202300  | 3.22462100  | -0.11607900 |
| O    | 1.06143900  | 2.84218700  | -1.41678900 |
| H    | -1.47538300 | 1.87475800  | -0.83233600 |

**Table S15.** Geometry of Prod<sub>5</sub> for DTAA. Units are in angstrom.

| Atom | X           | Y           | Z           |
|------|-------------|-------------|-------------|
| S    | 3.07292600  | -0.81310700 | 0.25589300  |
| O    | 4.20830300  | -0.04723200 | -0.05851600 |
| O    | 3.31562400  | -2.25681600 | -0.26607900 |
| O    | 2.49729300  | -0.84324000 | 1.54861100  |
| C    | -4.23640800 | -0.56262700 | -0.14160500 |
| C    | -5.07061500 | -0.77016100 | -1.37564000 |
| C    | 0.70718400  | -0.97450100 | -0.80859200 |
| C    | -2.08304500 | 0.34656300  | 0.56098800  |
| C    | -0.93915400 | 0.93950500  | -0.29503200 |
| O    | 0.63197400  | -2.12817400 | -0.50841100 |
| O    | 1.91196200  | -0.29518900 | -0.74746000 |
| H    | -6.00482800 | -1.24594200 | -1.10073200 |
| H    | -4.52610100 | -1.39189100 | -2.08383400 |
| H    | -5.25959400 | 0.18823000  | -1.85507600 |
| H    | 2.47979600  | -2.75594700 | -0.18472700 |
| O    | -4.55876100 | -0.88915200 | 0.96535200  |
| O    | -3.07970500 | 0.04195400  | -0.45380800 |
| C    | -2.64765500 | 1.39630700  | 1.51132200  |
| H    | -2.82273500 | 2.33806400  | 0.99038500  |
| H    | -3.58161100 | 1.03968800  | 1.93523600  |
| H    | -1.95355700 | 1.56964200  | 2.33138800  |
| C    | -1.66909700 | -0.91768800 | 1.30723700  |
| H    | -1.56181400 | -1.75425200 | 0.61987600  |
| H    | -0.71010900 | -0.76311300 | 1.80301700  |
| H    | -2.40953400 | -1.17844500 | 2.05628800  |
| C    | -0.37834500 | -0.08140000 | -1.32164200 |
| H    | -1.18402700 | -0.71251300 | -1.68405900 |
| H    | 0.04479500  | 0.48168900  | -2.15228600 |
| C    | 0.14095400  | 1.60681200  | 0.55361300  |
| H    | -0.30306800 | 2.38924200  | 1.17005700  |
| H    | 0.64002100  | 0.91834400  | 1.23518600  |
| C    | 1.18895600  | 2.29402300  | -0.28569200 |
| O    | 2.33168900  | 2.44533400  | 0.39192300  |
| H    | 2.98084200  | 2.85722400  | -0.19381300 |
| O    | 1.03258700  | 2.67860900  | -1.41024600 |
| H    | -1.39965600 | 1.71993400  | -0.90187400 |

**Table S16.** Geometry of DTASA-5-H<sub>2</sub>O. Units are in angstrom.

| Atom | X           | Y           | Z           |
|------|-------------|-------------|-------------|
| S    | 3.13684100  | -0.24296000 | -0.04130100 |
| O    | 3.98841200  | 0.82973400  | -0.37006400 |
| O    | 3.60168300  | -1.50765000 | -0.75880100 |
| O    | 2.77557500  | -0.53742300 | 1.30219100  |
| C    | -4.41257000 | -0.73926100 | -0.28283200 |
| C    | -5.15774900 | -0.94019700 | -1.57391100 |
| C    | 0.64147700  | -0.65956100 | -0.76789100 |
| C    | -2.36376600 | 0.27353900  | 0.58324100  |
| C    | -1.23086000 | 0.99851400  | -0.17883400 |
| O    | 0.67269200  | -1.79237100 | -0.38770900 |
| O    | 1.75890400  | 0.13085800  | -0.82524600 |
| H    | -6.09527600 | -1.44514400 | -1.37209100 |
| H    | -4.55054900 | -1.53764500 | -2.25194600 |
| H    | -5.33634700 | 0.02112700  | -2.05078600 |
| H    | 3.28911200  | -2.34687600 | -0.25058100 |
| O    | -4.77401900 | -1.14452400 | 0.78569700  |
| O    | -3.28503700 | -0.04471700 | -0.49693500 |
| C    | -3.05259000 | 1.22479900  | 1.55676800  |
| H    | -3.26175800 | 2.18227800  | 1.07899600  |
| H    | -3.98263100 | 0.78585800  | 1.90434500  |
| H    | -2.42246800 | 1.39566100  | 2.42741300  |
| C    | -1.89630700 | -0.99779100 | 1.28162300  |
| H    | -1.63103900 | -1.76275800 | 0.55486200  |
| H    | -1.01398200 | -0.78352000 | 1.88499200  |
| H    | -2.67584600 | -1.38447800 | 1.92996100  |
| C    | -0.55768400 | 0.10185200  | -1.25434700 |
| H    | -1.27873100 | -0.61436400 | -1.63693000 |
| H    | -0.22202400 | 0.74712000  | -2.06307000 |
| C    | -0.22000500 | 1.66480300  | 0.75064700  |
| H    | -0.72861100 | 2.32524000  | 1.45349500  |
| H    | 0.34970500  | 0.95216900  | 1.34835200  |
| C    | 0.75378000  | 2.53713400  | -0.00533600 |
| O    | 1.87346400  | 2.73265100  | 0.69666300  |
| H    | 2.49834800  | 3.22531400  | 0.14760600  |
| O    | 0.55649900  | 3.01291100  | -1.08736500 |
| H    | -1.72086800 | 1.79480800  | -0.73985800 |
| O    | 2.69363600  | -3.44051700 | 0.59945700  |
| H    | 2.90211200  | -3.19991200 | 1.50833800  |
| H    | 1.77455400  | -3.16212600 | 0.46985100  |

Table S17. Geometry of DTASA-5-NH<sub>3</sub>. Units are in angstrom.

| Atom | X           | Y           | Z           |
|------|-------------|-------------|-------------|
| S    | 3.17495700  | -0.29587000 | -0.08264300 |
| O    | 3.97016900  | 0.85804200  | -0.29404400 |
| O    | 3.59590500  | -1.48548400 | -0.82326900 |
| O    | 2.77700900  | -0.61034400 | 1.26908700  |
| C    | -4.40922500 | -0.72976100 | -0.27858900 |
| C    | -5.17319300 | -0.90111700 | -1.56363100 |
| C    | 0.65374600  | -0.63258800 | -0.80268300 |
| C    | -2.35409900 | 0.27577500  | 0.58283700  |
| C    | -1.22870700 | 1.01319600  | -0.17795000 |
| O    | 0.66928700  | -1.78704200 | -0.46289100 |
| O    | 1.74567400  | 0.15250800  | -0.82096300 |
| H    | -6.10562200 | -1.41528400 | -1.36122300 |
| H    | -4.57337400 | -1.47706100 | -2.26632600 |
| H    | -5.36269900 | 0.07145400  | -2.01273400 |
| H    | 3.08984100  | -2.70133100 | -0.07017300 |
| O    | -4.75696800 | -1.16434800 | 0.78394900  |
| O    | -3.28917600 | -0.02777500 | -0.49163500 |
| C    | -3.03777100 | 1.20694000  | 1.57898400  |
| H    | -3.25285400 | 2.17209100  | 1.11968700  |
| H    | -3.96367200 | 0.75961900  | 1.92735800  |
| H    | -2.39928300 | 1.36477200  | 2.44586800  |
| C    | -1.87707000 | -1.00611500 | 1.25515200  |
| H    | -1.61380300 | -1.75463600 | 0.51078900  |
| H    | -0.98817200 | -0.79650300 | 1.85038200  |
| H    | -2.64861300 | -1.40629600 | 1.90508300  |
| C    | -0.55854200 | 0.13209000  | -1.26697900 |
| H    | -1.28070300 | -0.57932100 | -1.65672600 |
| H    | -0.23126700 | 0.79076000  | -2.06814000 |
| C    | -0.21789800 | 1.66920800  | 0.75914500  |
| H    | -0.72479900 | 2.32607700  | 1.46661400  |
| H    | 0.34967000  | 0.94797400  | 1.34815700  |
| C    | 0.76707600  | 2.54003200  | 0.01527700  |
| O    | 1.87334700  | 2.73251800  | 0.73530700  |
| H    | 2.53503600  | 3.16576000  | 0.17964800  |
| O    | 0.58299800  | 3.01781600  | -1.06890400 |
| H    | -1.72571700 | 1.81625300  | -0.72349500 |
| N    | 2.58828900  | -3.30828700 | 0.68154500  |
| H    | 1.66527700  | -3.53569000 | 0.31946200  |
| H    | 2.47304900  | -2.62398200 | 1.43783000  |
| H    | 3.10850800  | -4.12580500 | 0.97692800  |

**Table S18.** Geometry of DTASA-5-DMA. Units are in angstrom.

| Atom | X           | Y           | Z           |
|------|-------------|-------------|-------------|
| S    | -2.87103500 | -0.65437300 | -0.26336600 |
| O    | -3.40065800 | -1.96495900 | -0.38924000 |
| O    | -3.48199500 | 0.35355700  | -1.12163200 |
| O    | -2.60146200 | -0.15587500 | 1.06372200  |
| C    | 4.51693100  | 1.23031800  | -0.27573100 |
| C    | 5.30904500  | 1.40584000  | -1.54305900 |
| C    | -0.42401000 | 0.11362800  | -0.91633500 |
| C    | 2.64446100  | -0.05441600 | 0.62612900  |
| C    | 1.70948200  | -1.05852300 | -0.08654500 |
| O    | -0.67440900 | 1.26417300  | -0.65675500 |
| O    | -1.33764100 | -0.86635200 | -0.91682900 |
| H    | 6.07081200  | 2.16140300  | -1.38872800 |
| H    | 4.64487000  | 1.69834200  | -2.35395900 |
| H    | 5.76750100  | 0.45839900  | -1.81969400 |
| H    | -3.22237900 | 1.75530700  | -0.38355200 |
| O    | 4.72018400  | 1.83050300  | 0.74285600  |
| O    | 3.56022400  | 0.30989000  | -0.44621300 |
| C    | 3.43907800  | -0.73951500 | 1.73330100  |
| H    | 3.84976300  | -1.68697200 | 1.38325800  |
| H    | 4.24939300  | -0.09311000 | 2.05767300  |
| H    | 2.80006800  | -0.93014300 | 2.59328400  |
| C    | 1.90968100  | 1.17497900  | 1.14765600  |
| H    | 1.56708100  | 1.79665100  | 0.32328200  |
| H    | 1.03450800  | 0.86046100  | 1.71587200  |
| H    | 2.55507200  | 1.76296600  | 1.79202400  |
| C    | 0.93772800  | -0.42353600 | -1.27628400 |
| H    | 1.52369400  | 0.38621500  | -1.70119200 |
| H    | 0.79142000  | -1.19625500 | -2.02720900 |
| C    | 0.79375700  | -1.79901900 | 0.88450000  |
| H    | 1.37744800  | -2.26416900 | 1.67911200  |
| H    | 0.06387500  | -1.14733300 | 1.36681900  |
| C    | 0.03668500  | -2.91813800 | 0.20813300  |
| O    | -1.04660700 | -3.25414400 | 0.90988100  |
| H    | -1.58899500 | -3.85227800 | 0.37819500  |
| O    | 0.36614700  | -3.45403500 | -0.81239100 |
| H    | 2.36977800  | -1.80307100 | -0.53271000 |
| N    | -2.92876600 | 2.51403300  | 0.29800300  |
| H    | -2.09143400 | 2.08247100  | 0.69780600  |
| C    | -3.97274400 | 2.67454700  | 1.32803600  |
| H    | -4.88286600 | 3.02668700  | 0.85042700  |
| H    | -3.64211300 | 3.39712300  | 2.06977800  |

|   |             |            |             |
|---|-------------|------------|-------------|
| H | -4.13786100 | 1.70469000 | 1.78680300  |
| C | -2.57166500 | 3.74860700 | -0.42268800 |
| H | -3.45251400 | 4.11899100 | -0.93987500 |
| H | -1.78893300 | 3.50982700 | -1.13519800 |
| H | -2.22110500 | 4.49484600 | 0.28575400  |

**Table S19.** Geometry of DTASA-5-SA. Units are in angstrom.

| Atom | X           | Y           | Z           |
|------|-------------|-------------|-------------|
| S    | -1.36621800 | 2.34999200  | 0.16626800  |
| O    | -2.72360200 | 1.95659800  | 0.22917000  |
| O    | -1.26611900 | 3.45923100  | -0.91216400 |
| O    | -0.62729300 | 2.69329500  | 1.31787800  |
| C    | 5.28868000  | -0.85672900 | -0.63559200 |
| C    | 5.77858100  | -1.48371400 | -1.91110900 |
| C    | 0.71529600  | 1.23952100  | -0.92494400 |
| C    | 3.22874600  | -0.46237700 | 0.61440900  |
| C    | 1.76751600  | -0.80132300 | 0.23421100  |
| O    | 1.20127500  | 2.31352400  | -1.09663800 |
| O    | -0.62086600 | 1.11580700  | -0.54444700 |
| H    | 6.85436300  | -1.36878900 | -1.97550700 |
| H    | 5.29796200  | -1.00570600 | -2.76266800 |
| H    | 5.50866200  | -2.53780300 | -1.92827000 |
| H    | -0.32563000 | 3.68168000  | -1.04877800 |
| O    | 5.98486500  | -0.31274200 | 0.17291700  |
| O    | 3.95575000  | -0.99298300 | -0.52632700 |
| C    | 3.64894000  | -1.22069300 | 1.86885300  |
| H    | 3.35100300  | -2.26776000 | 1.80688100  |
| H    | 4.72629300  | -1.16083500 | 1.98824800  |
| H    | 3.19342200  | -0.77460100 | 2.75077400  |
| C    | 3.46991700  | 1.03614500  | 0.75877900  |
| H    | 3.42110800  | 1.53324700  | -0.20800700 |
| H    | 2.71138900  | 1.47669100  | 1.40598800  |
| H    | 4.44570900  | 1.22384100  | 1.19459800  |
| C    | 1.33072000  | -0.11337900 | -1.08982000 |
| H    | 2.18826300  | -0.01235100 | -1.74779700 |
| H    | 0.58090800  | -0.74263600 | -1.56582100 |
| C    | 0.79472900  | -0.57495800 | 1.38953800  |
| H    | 1.10863500  | -1.15429600 | 2.25889500  |
| H    | 0.74528900  | 0.46481200  | 1.71507500  |
| C    | -0.60917700 | -1.03073100 | 1.08749500  |
| O    | -1.50176200 | -0.45548900 | 1.84710200  |
| H    | -2.42478900 | -0.73865600 | 1.60904200  |
| O    | -0.86024100 | -1.85660800 | 0.22700400  |
| H    | 1.76268900  | -1.86830700 | 0.00997000  |

|   |             |             |             |
|---|-------------|-------------|-------------|
| S | -4.16053300 | -1.43618800 | -0.34874900 |
| O | -5.44893400 | -1.82967300 | -0.75592800 |
| O | -3.92850000 | -1.08481200 | 1.03055700  |
| O | -3.16610200 | -2.53317500 | -0.76630200 |
| H | -2.26053200 | -2.33389200 | -0.38287600 |
| O | -3.68144200 | -0.22042900 | -1.21033000 |
| H | -3.47664100 | 0.55356700  | -0.65089700 |

**Table S20.** Geometry of DTAA-H<sub>2</sub>O. Units are in angstrom

| Atom | X           | Y           | Z           |
|------|-------------|-------------|-------------|
| C    | -3.65042900 | -0.31191300 | 0.45881700  |
| C    | -4.36847500 | -0.04603900 | 1.75407000  |
| C    | 0.72786300  | 1.96828200  | -0.18176500 |
| C    | -1.39660700 | -0.59131200 | -0.43676000 |
| C    | -0.02752500 | -0.45682500 | 0.27262500  |
| O    | 0.12182700  | 3.16488500  | -0.08181100 |
| O    | 1.62398800  | 1.77658500  | -0.95802800 |
| H    | -5.43588400 | -0.00541900 | 1.57064400  |
| H    | -4.02141000 | 0.89427600  | 2.17810900  |
| H    | -4.13752800 | -0.83463500 | 2.46756900  |
| H    | 0.55468300  | 3.75660100  | -0.71133000 |
| O    | -4.18996200 | -0.46308300 | -0.60161900 |
| O    | -2.32683000 | -0.35832000 | 0.65845400  |
| C    | -1.60832500 | -2.00175200 | -0.97294600 |
| H    | -1.37714500 | -2.74170200 | -0.20598000 |
| H    | -2.63847300 | -2.12530000 | -1.29308200 |
| H    | -0.96421200 | -2.17533600 | -1.83289000 |
| C    | -1.58321500 | 0.45888000  | -1.52837400 |
| H    | -1.71262500 | 1.44865800  | -1.09071600 |
| H    | -0.70442900 | 0.48042000  | -2.17211900 |
| H    | -2.45649100 | 0.23600800  | -2.13259500 |
| C    | 0.19328300  | 0.96982900  | 0.80801700  |
| H    | -0.72847200 | 1.34842600  | 1.24025800  |
| H    | 0.94120000  | 0.92496500  | 1.59958500  |
| C    | 1.11094900  | -1.00147900 | -0.59231500 |
| H    | 0.98639000  | -2.07787400 | -0.72379200 |
| H    | 1.13631400  | -0.56389300 | -1.58693100 |
| C    | 2.48005200  | -0.83052000 | 0.00806300  |
| O    | 3.44046000  | -1.02701300 | -0.87986500 |
| H    | 4.30924700  | -0.92298500 | -0.43551600 |
| O    | 2.69082300  | -0.59441400 | 1.17805300  |
| H    | -0.09315000 | -1.09244600 | 1.15742600  |
| O    | 5.45007900  | -0.64336000 | 0.93354900  |



|   |            |             |            |
|---|------------|-------------|------------|
| H | 4.63576400 | -0.50189500 | 1.44152500 |
| H | 5.95770600 | 0.16700400  | 1.00338200 |

**Table S21.** Geometry of DTAA-NH<sub>3</sub>. Units are in angstrom

| Atom | X           | Y           | Z           |
|------|-------------|-------------|-------------|
| C    | -3.65458700 | -0.36966100 | 0.45284100  |
| C    | -4.37530700 | -0.11946700 | 1.75021700  |
| C    | 0.63963800  | 2.01400900  | -0.16185000 |
| C    | -1.39528700 | -0.60174400 | -0.44621600 |
| C    | -0.02931800 | -0.44483800 | 0.26377500  |
| O    | 0.00817000  | 3.19337300  | -0.00558300 |
| O    | 1.51119400  | 1.87016400  | -0.97502900 |
| H    | -5.44363500 | -0.09714000 | 1.56886700  |
| H    | -4.04379700 | 0.82588000  | 2.17552000  |
| H    | -4.12904700 | -0.90531100 | 2.46161100  |
| H    | 0.40697300  | 3.81181000  | -0.63188000 |
| O    | -4.19491000 | -0.52663200 | -0.60674900 |
| O    | -2.33138600 | -0.39411500 | 0.65070200  |
| C    | -1.58037800 | -2.01294200 | -0.99033100 |
| H    | -1.32469200 | -2.75262200 | -0.23091500 |
| H    | -2.61043800 | -2.15769400 | -1.30211700 |
| H    | -0.93986200 | -2.16516700 | -1.85688400 |
| C    | -1.60514000 | 0.44959700  | -1.53206400 |
| H    | -1.74930700 | 1.43514000  | -1.08919100 |
| H    | -0.72896000 | 0.48805500  | -2.17827000 |
| H    | -2.47734300 | 0.21479900  | -2.13345100 |
| C    | 0.16242400  | 0.97813900  | 0.81825000  |
| H    | -0.75800100 | 1.32131200  | 1.28192700  |
| H    | 0.93271000  | 0.93753600  | 1.58875000  |
| C    | 1.12534900  | -0.95433700 | -0.59954800 |
| H    | 1.00710200  | -2.02496200 | -0.77440800 |
| H    | 1.16862600  | -0.47805900 | -1.57553200 |
| C    | 2.48417400  | -0.80331800 | 0.03870300  |
| O    | 3.46280200  | -0.99816600 | -0.82591700 |
| H    | 4.33648700  | -0.89792400 | -0.35171000 |
| O    | 2.66335900  | -0.57955900 | 1.21517300  |
| H    | -0.08161100 | -1.09061500 | 1.14240500  |
| N    | 5.63345500  | -0.60560500 | 0.78091600  |
| H    | 6.15873100  | 0.25256400  | 0.66996400  |
| H    | 6.28394000  | -1.33566000 | 1.04167700  |
| H    | 4.97469500  | -0.47585600 | 1.54377900  |

Table S22. Geometry of DTAA-DMA. Units are in angstrom.

| Atom | X           | Y           | Z           |
|------|-------------|-------------|-------------|
| C    | -4.33408000 | -0.22075400 | 0.49257200  |
| C    | -5.03526100 | 0.09551000  | 1.78608000  |
| C    | 0.13713200  | 1.87142900  | -0.23615400 |
| C    | -2.09801600 | -0.60931400 | -0.40746200 |
| C    | -0.71931900 | -0.50859800 | 0.28727800  |
| O    | -0.46297900 | 3.07620500  | -0.21922200 |
| O    | 1.06188400  | 1.63970200  | -0.96762400 |
| H    | -6.10072000 | 0.17881300  | 1.60532300  |
| H    | -4.64715200 | 1.02612400  | 2.19562300  |
| H    | -4.83583800 | -0.69183200 | 2.51046600  |
| H    | -0.00387100 | 3.63113800  | -0.86320200 |
| O    | -4.88617900 | -0.37137000 | -0.56182400 |
| O    | -3.01321100 | -0.31333500 | 0.68666700  |
| C    | -2.36946100 | -2.02369800 | -0.90467900 |
| H    | -2.16215300 | -2.75145400 | -0.11954000 |
| H    | -3.40607300 | -2.11422400 | -1.21526100 |
| H    | -1.73881100 | -2.24608800 | -1.76326600 |
| C    | -2.25360900 | 0.41900700  | -1.52469400 |
| H    | -2.35724000 | 1.42171000  | -1.11087000 |
| H    | -1.37221200 | 0.40204400  | -2.16532700 |
| H    | -3.13062300 | 0.20574200  | -2.12709100 |
| C    | -0.44021800 | 0.92522100  | 0.77951200  |
| H    | -1.34554200 | 1.35407800  | 1.19914000  |
| H    | 0.30867500  | 0.86846600  | 1.56893800  |
| C    | 0.39084800  | -1.12051000 | -0.56843200 |
| H    | 0.22385200  | -2.19382600 | -0.67131900 |
| H    | 0.42099500  | -0.71033200 | -1.57509200 |
| C    | 1.77588200  | -0.97530500 | 0.01360000  |
| O    | 2.71760100  | -1.24575500 | -0.86681900 |
| H    | 3.61721700  | -1.05836000 | -0.43759900 |
| O    | 2.00043000  | -0.68050000 | 1.16770100  |
| H    | -0.80122500 | -1.11318100 | 1.19226400  |
| N    | 4.85012100  | -0.37340300 | 0.45627500  |
| H    | 4.41429500  | -0.55413200 | 1.35476000  |
| C    | 4.68219200  | 1.04069300  | 0.12966700  |
| H    | 5.05382800  | 1.21594800  | -0.87957100 |
| H    | 5.22638100  | 1.69663100  | 0.81667800  |
| H    | 3.62286100  | 1.29120800  | 0.15336900  |
| C    | 6.24550900  | -0.78944500 | 0.46397300  |
| H    | 6.65322100  | -0.69186300 | -0.54161200 |
| H    | 6.31878800  | -1.83304700 | 0.76160600  |
| H    | 6.86053800  | -0.18474100 | 1.13906200  |

**Table S23.** Geometry of DTAA-SA. Units are in angstrom.

| Atom | X           | Y           | Z           |
|------|-------------|-------------|-------------|
| C    | -4.98160900 | -0.38274500 | 0.85459000  |
| C    | -5.47614200 | -0.22154000 | 2.26587000  |
| C    | -0.75035100 | 1.99128900  | -0.33155000 |
| C    | -2.90716500 | -0.56399900 | -0.41819900 |
| C    | -1.43927900 | -0.45932800 | 0.06298100  |
| O    | -1.34574200 | 3.16992900  | -0.08977800 |
| O    | 0.03931300  | 1.84851700  | -1.22571900 |
| H    | -6.55984800 | -0.21257000 | 2.26675300  |
| H    | -5.09226200 | 0.70832900  | 2.68173600  |
| H    | -5.10285100 | -1.03722500 | 2.88159300  |
| H    | -1.00321400 | 3.80307000  | -0.73510400 |
| O    | -5.68653200 | -0.45943200 | -0.11201000 |
| O    | -3.64152400 | -0.42745600 | 0.82951100  |
| C    | -3.19913000 | -1.93530400 | -1.01510600 |
| H    | -2.83937400 | -2.72497500 | -0.35466100 |
| H    | -4.26810400 | -2.05308600 | -1.16509000 |
| H    | -2.71208900 | -2.03731100 | -1.98320500 |
| C    | -3.27610000 | 0.56073800  | -1.38209800 |
| H    | -3.34034100 | 1.51292900  | -0.85565100 |
| H    | -2.51644900 | 0.65000800  | -2.15822200 |
| H    | -4.23457400 | 0.36752200  | -1.85224200 |
| C    | -1.14176000 | 0.92930800  | 0.65899800  |
| H    | -1.99310900 | 1.26835200  | 1.24167900  |
| H    | -0.29145300 | 0.84315300  | 1.33490200  |
| C    | -0.46533100 | -0.92060500 | -1.02499000 |
| H    | -0.59526400 | -1.99121600 | -1.19734200 |
| H    | -0.62609200 | -0.42774500 | -1.98011200 |
| C    | 0.98501200  | -0.75549000 | -0.67981500 |
| O    | 1.77248300  | -0.82927600 | -1.71604500 |
| H    | 2.71857300  | -0.74771600 | -1.45210900 |
| O    | 1.38140500  | -0.62914800 | 0.47150000  |
| H    | -1.35416000 | -1.16168000 | 0.89363600  |
| S    | 4.78408300  | -0.25095200 | 0.41059800  |
| O    | 6.03423100  | -0.69559200 | 0.89777800  |
| O    | 4.32959600  | -0.63658800 | -0.89025200 |
| O    | 4.79505100  | 1.32628700  | 0.36700000  |
| O    | 3.70471100  | -0.57699100 | 1.44415500  |
| H    | 5.34631100  | 1.66353300  | 1.08470600  |
| H    | 2.76613700  | -0.58409200 | 1.02594700  |

**Table S24.** Geometry of SA-H<sub>2</sub>O. Units are in angstrom.

| Atom | X           | Y           | Z           |
|------|-------------|-------------|-------------|
| S    | 0.57427700  | -0.07595500 | 0.12159100  |
| O    | -0.21560500 | 0.28880800  | 1.24846000  |
| O    | 1.73770000  | -0.87044400 | 0.24743700  |
| O    | -0.33853300 | -0.73229600 | -0.94176200 |
| O    | 0.97912100  | 1.29126500  | -0.55273900 |
| H    | -1.28989000 | -0.46901700 | -0.77380000 |
| H    | 1.73614800  | 1.15035600  | -1.13565000 |
| O    | -2.66195900 | 0.10598500  | -0.10975800 |
| H    | -2.25927400 | 0.36134000  | 0.73181200  |
| H    | -3.38119900 | -0.49394900 | 0.09908600  |

**Table S25.** Geometry of SA-NH<sub>3</sub>. Units are in angstrom.

| Atom | X           | Y           | Z           |
|------|-------------|-------------|-------------|
| S    | -0.59870500 | -0.11256700 | 0.08524700  |
| O    | 0.10265000  | -0.10743600 | 1.32425800  |
| O    | -1.75716300 | -0.90622700 | -0.10955500 |
| O    | 0.38798200  | -0.38892900 | -1.05713200 |
| O    | -1.00872200 | 1.40007000  | -0.15516000 |
| H    | 1.36768300  | -0.20347800 | -0.74044000 |
| H    | -1.74400800 | 1.42970200  | -0.77955700 |
| N    | 2.73195900  | 0.04327500  | -0.05125300 |
| H    | 3.19562900  | 0.91429100  | -0.27855800 |
| H    | 3.40590000  | -0.70670600 | -0.14509700 |
| H    | 2.43238300  | 0.08452300  | 0.91917700  |

**Table S26.** Geometry of SA-DMA. Units are in angstrom.

| Atom | X           | Y           | Z           |
|------|-------------|-------------|-------------|
| S    | -1.26717000 | -0.17444900 | 0.04935400  |
| O    | -0.55303500 | 0.01477400  | 1.29329000  |
| O    | -2.47253700 | -0.93652700 | 0.07870500  |
| O    | -1.69112200 | 1.32457000  | -0.34716300 |
| H    | -2.47666900 | 1.27230700  | -0.90279200 |
| O    | -0.33408600 | -0.58638100 | -1.02046000 |
| H    | 1.04041000  | -0.40387800 | -0.47189000 |
| N    | 1.89038900  | -0.11189200 | 0.15003100  |
| H    | 1.50173900  | -0.28839600 | 1.08018800  |
| C    | 2.05507200  | 1.34602100  | -0.01704800 |

|   |            |             |             |
|---|------------|-------------|-------------|
| H | 2.34477000 | 1.54536200  | -1.04521900 |
| H | 2.81928400 | 1.71350900  | 0.66344800  |
| H | 1.09835400 | 1.81525600  | 0.19621800  |
| C | 3.10083700 | -0.90096300 | -0.11961800 |
| H | 3.40294100 | -0.73456800 | -1.15005600 |
| H | 2.87986900 | -1.95367900 | 0.02709200  |
| H | 3.90207800 | -0.59331900 | 0.54813300  |

**Table S27.** Geometry of SA-SA. Units are in angstrom.

| Atom | X           | Y           | Z           |
|------|-------------|-------------|-------------|
| S    | -2.03548700 | -0.07317300 | 0.11417400  |
| O    | -1.06716200 | 0.08449600  | 1.15674100  |
| O    | -3.31102400 | -0.60315200 | 0.39613000  |
| O    | -2.18063600 | 1.36956700  | -0.49185400 |
| H    | -2.95953500 | 1.41530400  | -1.06305500 |
| O    | -1.42366900 | -0.89022200 | -1.03840600 |
| H    | -0.46245000 | -0.65740800 | -1.15787100 |
| O    | 1.06711100  | -0.08504100 | -1.15665100 |
| S    | 2.03544700  | 0.07316900  | -0.11418100 |
| O    | 1.42339800  | 0.89015600  | 1.03831400  |
| O    | 3.31076000  | 0.60360000  | -0.39631800 |
| O    | 2.18123300  | -1.36941800 | 0.49205900  |
| H    | 0.46224000  | 0.65707100  | 1.15783700  |
| H    | 2.96028900  | -1.41477800 | 1.06307600  |
